# Supplementary material for: Human neutralizing antibodies against SARS-CoV-2 require intact Fc effector functions and monocytes for optimal therapeutic protection
Source: bioRxiv or medRxiv preprint supplement (doi:10.1101/2020.12.28.424554), 2020-12-28
Supplement: Supplementary file [file media-1.pdf]

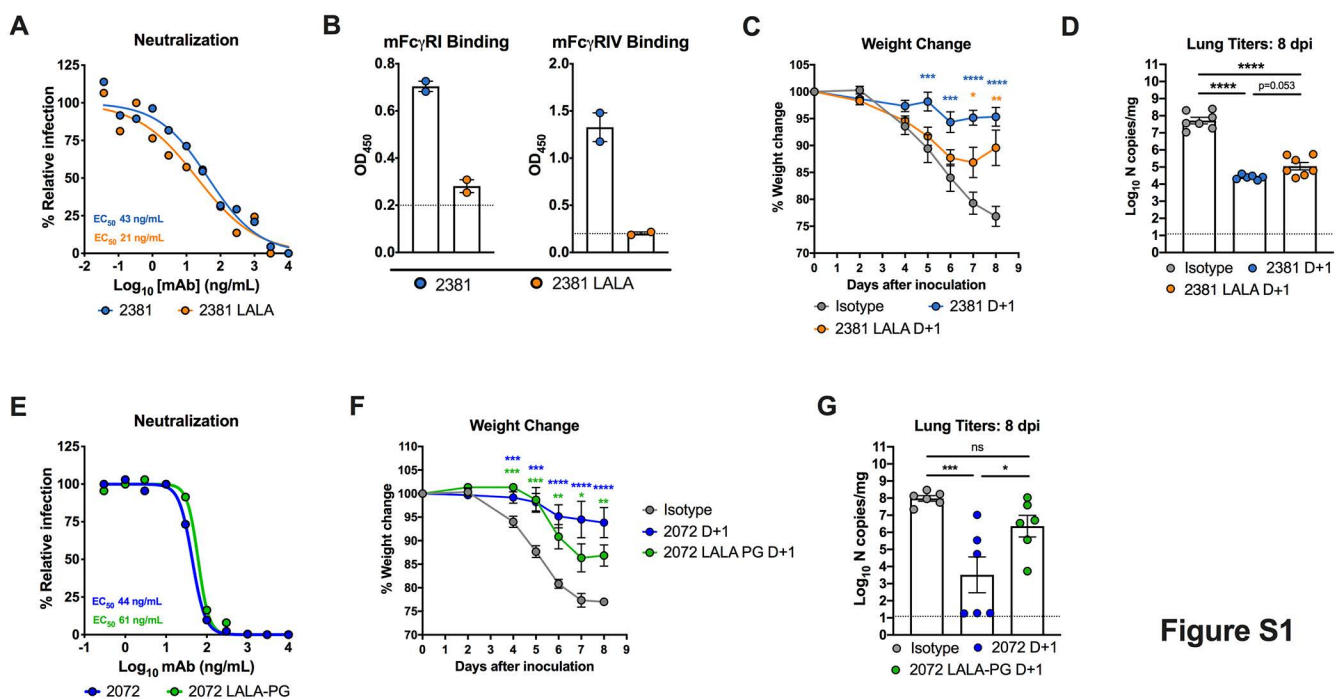

**Figure S1**

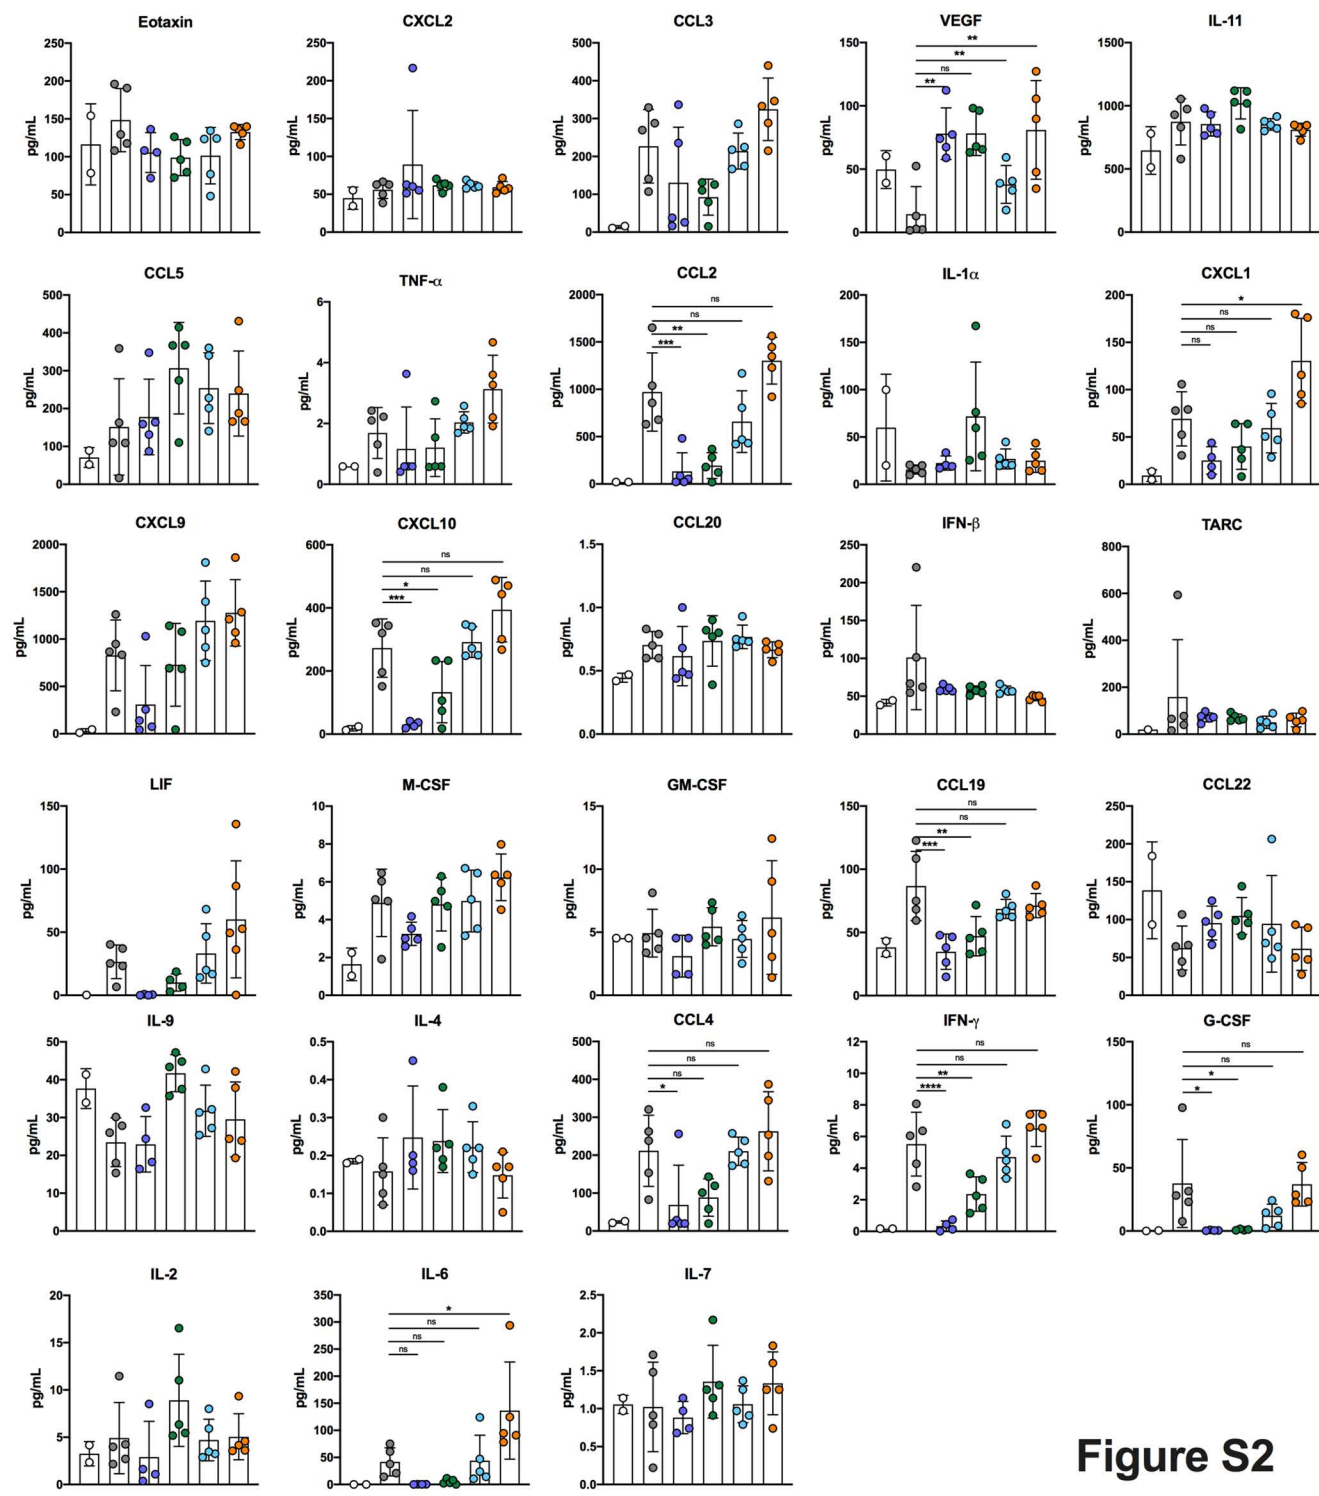

**Figure S2**

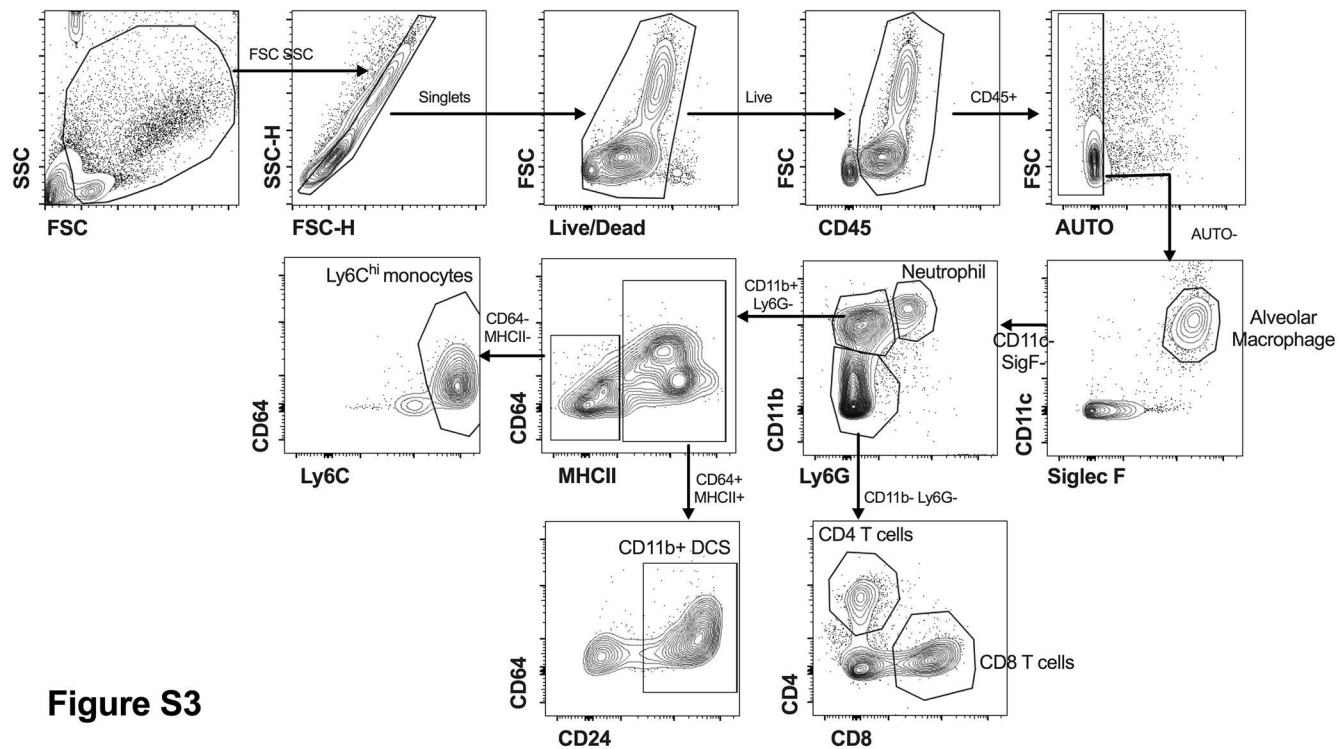

**Figure S3**

**A**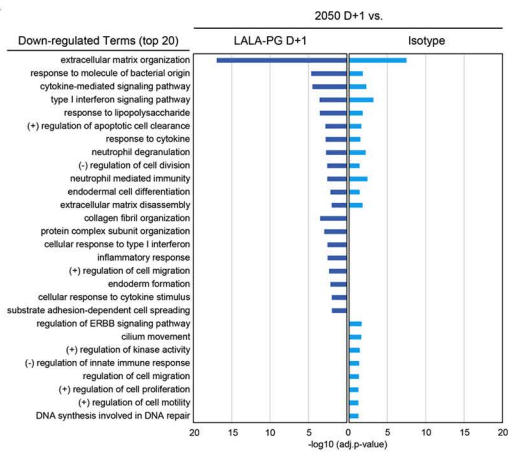**B**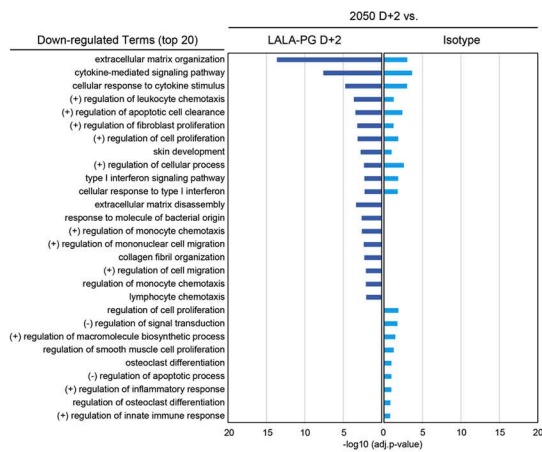**C**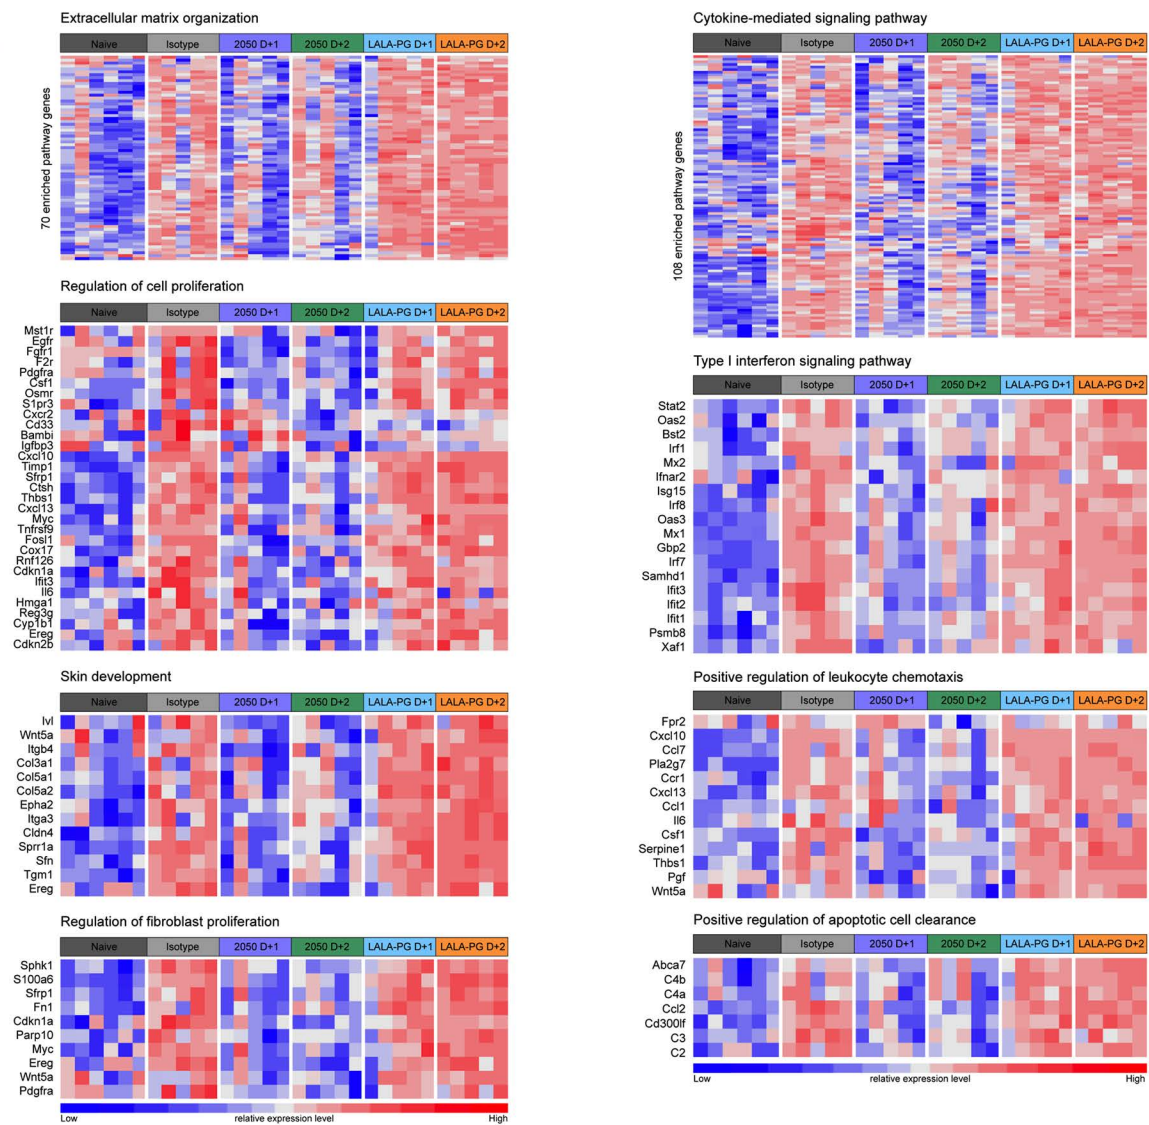**Figure S4**

### TIMP/MMP-associated extracellular matrix remodeling

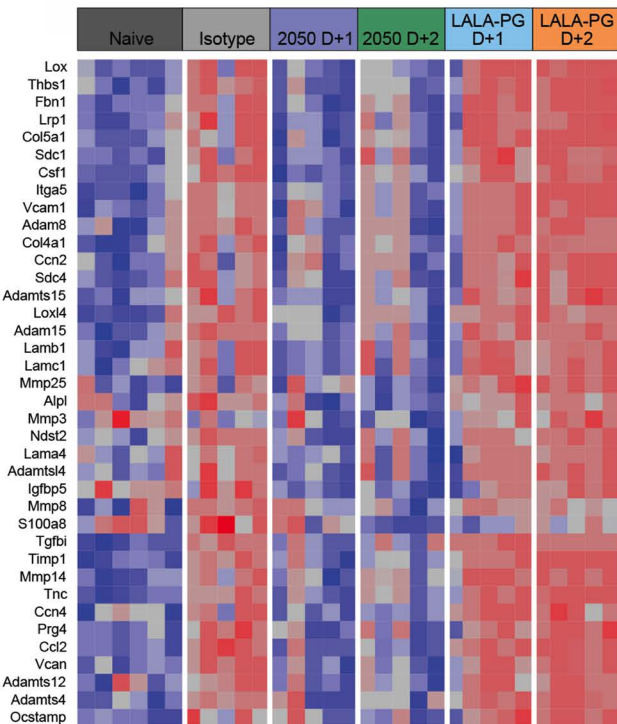

### S100A8-associated innate immune system

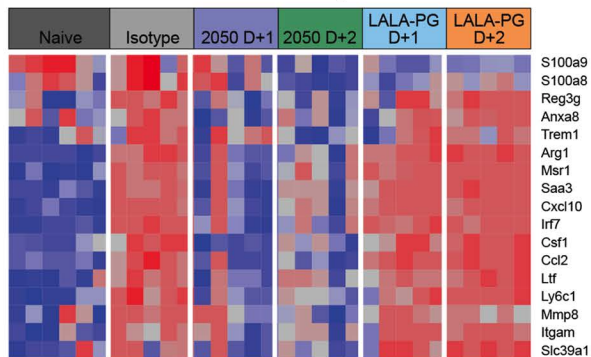

### Oncostatin M receptor-associated signaling

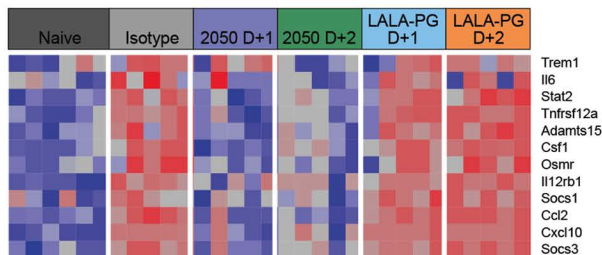

**Figure S5**

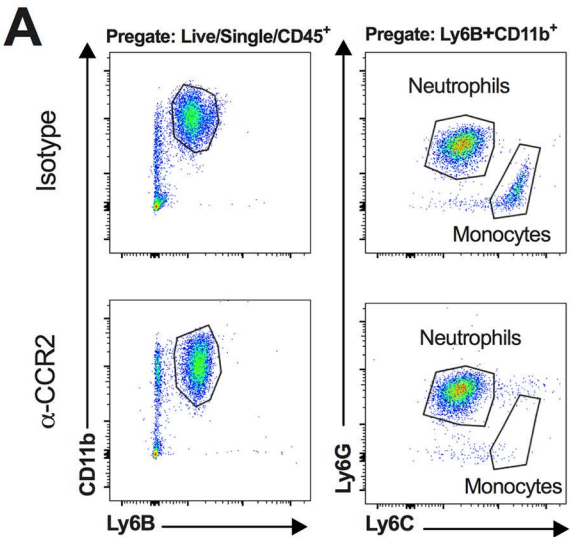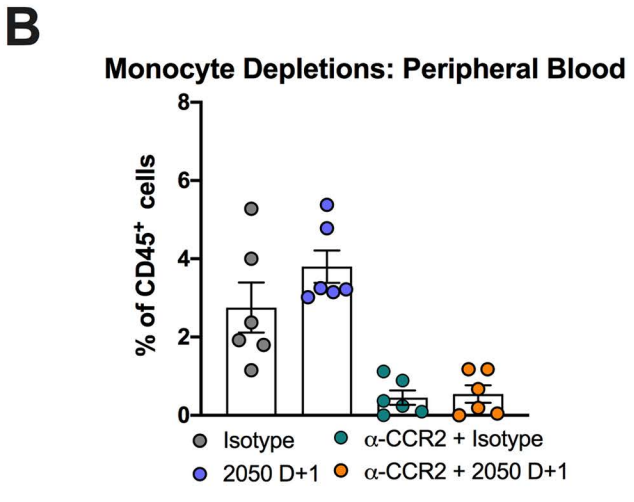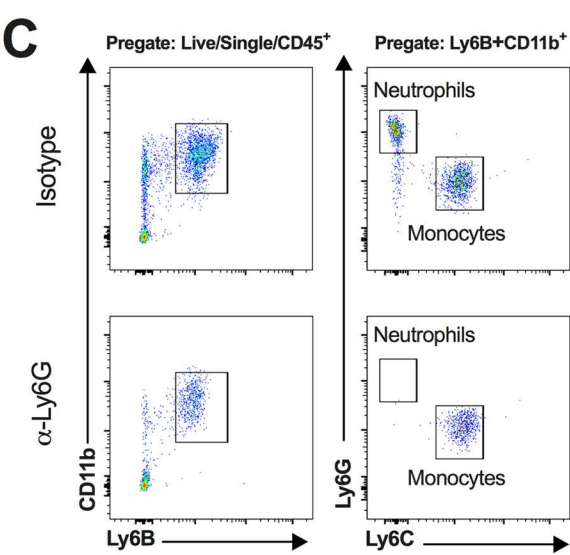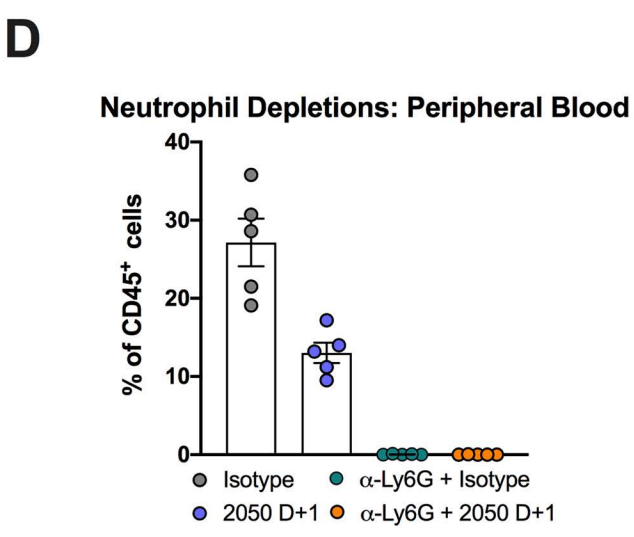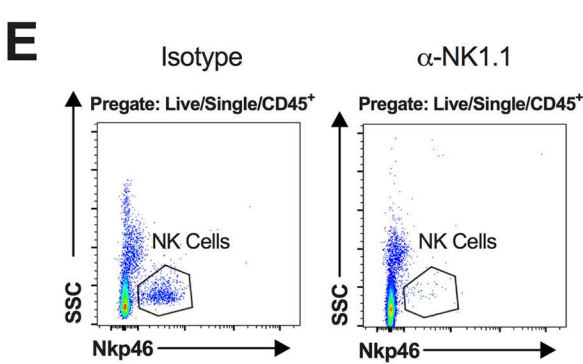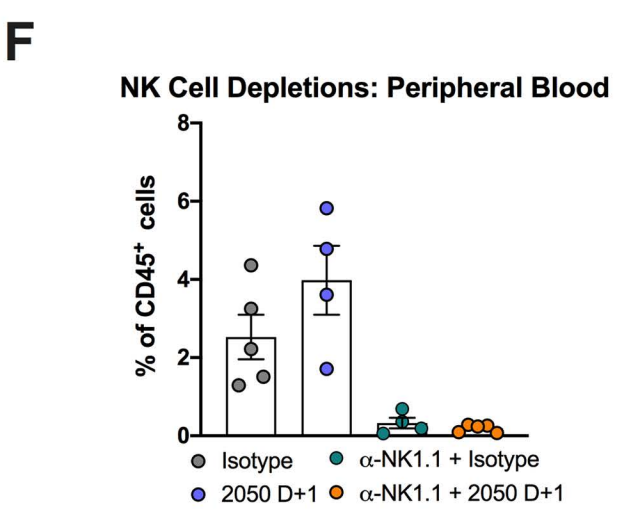

**Figure S6**
